# Supplementary material
Source: Springer Nature journal article supplement (https://www.springermedizin.de/resource/supplementary/12985_2009_781_MOESM4_ESM.pdf/9609148)

Hours after infection

0

24

48

96

A

JFH1-GFP

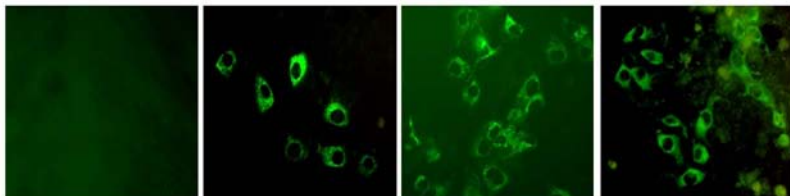

B

JFH1- $\Delta$ E1E2  
-GFP

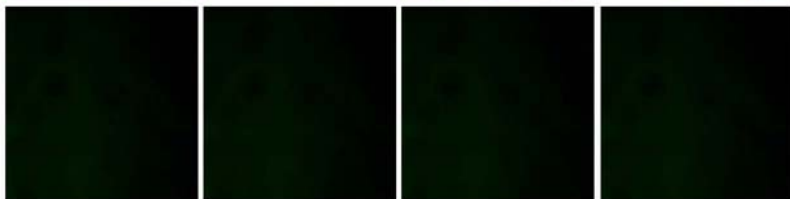

C

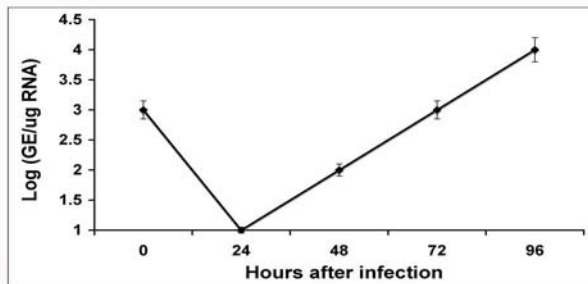

Supplement: MOESM4 [file 9609148]
